# Supplementary material for: Gamma irradiation induced synthesis of electromagnetic functionalized aligned CoxNi1−x alloy nanobundles
Source: Royal Society of Chemistry journal article supplement (doi:10.1039/c6ra14085h), 2016-01-01
Supplement: c6ra14085h1.pdf [file c6ra14085h1.pdf]

## Supporting Information

### Gamma irradiation induced synthesis of electromagnetic functionalized aligned $\text{Co}_x\text{Ni}_{1-x}$ alloy nanobundles

Hongtao Zhao,<sup>\*ab</sup> Zhigang Li,<sup>b</sup> Nan Zhang,<sup>b</sup> Yunchen Du,<sup>\*bc</sup> and Ping Xu<sup>\*bc</sup>

<sup>a</sup> Fundamental Science on Nuclear Safety and Simulation Technology Laboratory, Harbin Engineering University, Harbin 150009, China. Email: zhaohongtao1976@163.com

<sup>b</sup> HIT-HAS Laboratory of High-Energy Chemistry and Interdisciplinary Science, I Harbin Institute of Technology, Harbin 150001, China

<sup>c</sup> School of Chemistry and Chemical Engineering, Harbin Institute of Technology, Harbin 150001, China. E-mail: pxu@hit.edu.cn; yunchendu@hit.edu.cn; Fax: +86-451-8641-8750

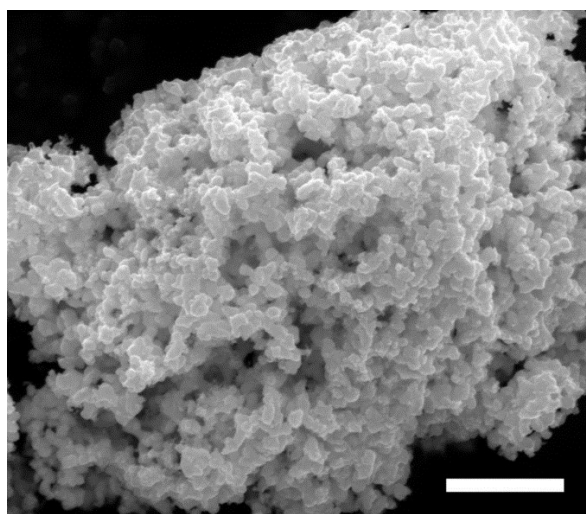

**Fig. S1.** SEM image of the aggregated particles of  $\text{Co}_1\text{Ni}_1$  without external magnetic field (scale bar: 1  $\mu\text{m}$ ).

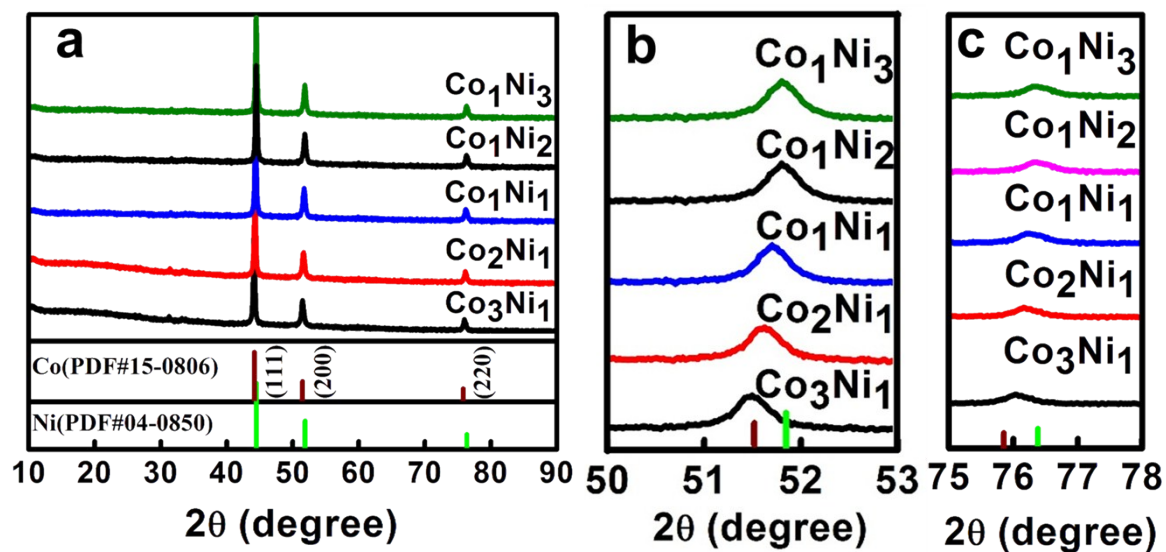

**Fig.S2** XRD patterns of the five samples (a) and magnified XRD patterns of the samples of the (200) and (220) peaks (b and c).

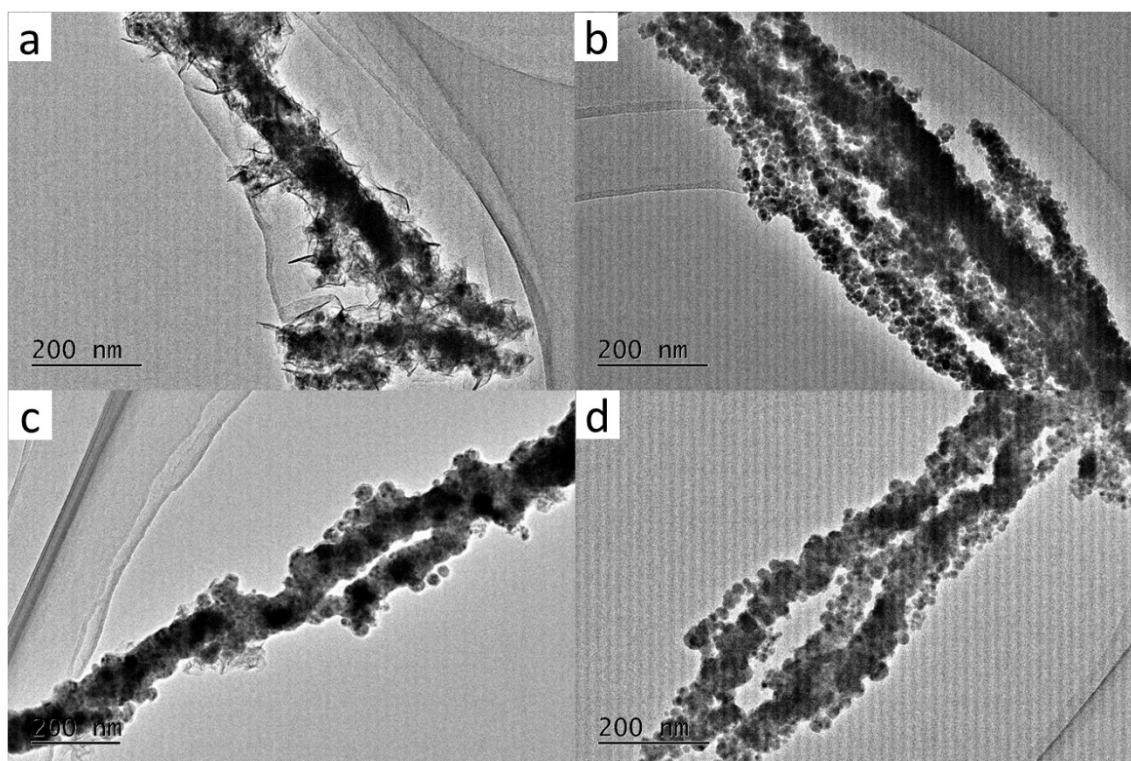

**Fig. S3** TEM images of the  $\text{Co}_x\text{Ni}_{1-x}$  alloys with the ratio of 3:1(a), 2:1(b), 1:2 (c), 1:3(d)

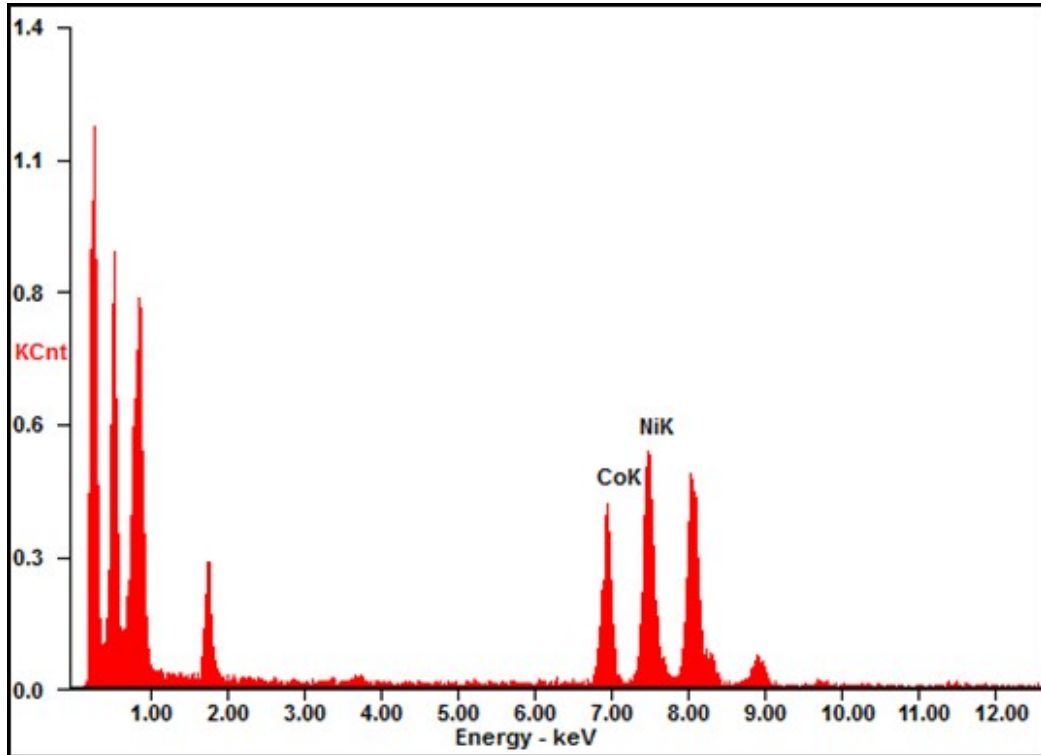

Fig. S4 EDS spectrum of the  $\text{Co}_1\text{Ni}_1$  alloy

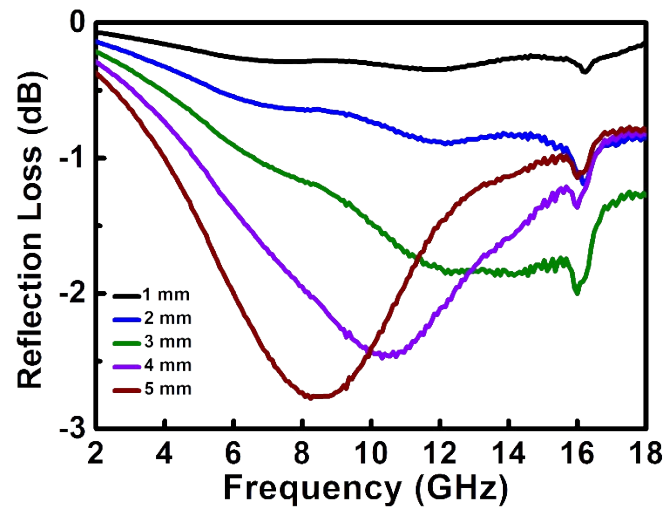

Fig. S5. RL properties of the aggregated particles of  $\text{Co}_1\text{Ni}_1$  without external magnetic field

**Table S1** Comparison of the microwave absorption properties of the magnetic metals or metal alloys

| Absorber                          | Integrated thickness(mm) | Max RL (Frequency, Thickness) | Bandwidth over -10dB(GHz)                                 | Effective bandwidth(RL<-10dB)                         | Ref                                                                             |
|-----------------------------------|--------------------------|-------------------------------|-----------------------------------------------------------|-------------------------------------------------------|---------------------------------------------------------------------------------|
| CoNi nanoflowers                  | 2-5                      | -28.55 dB<br>(6.8GHz,2mm)     | 6.5GHz-13.0GHz<br>(achieved by 0.6 $\mu$ m nanoflower)    | 6.5GHz (achieved by 0.6 $\mu$ m nanoflower)           | ACS Appl. Mater. Interfaces 2015, 7, 4233–4240                                  |
| Co <sub>20</sub> Ni <sub>80</sub> | 2-5                      | -33.5 dB<br>(3GHz,5mm)        | 6.0GHz-11.5GHz                                            | 5.5 GHz                                               | Nanoscale, 2015, 7, 1736                                                        |
| CoNi nanoparticles                | 2                        | -32 dB<br>(8.2GHz,2mm)        | 7.5-9.2GHz (achieved by Co <sub>1</sub> Ni <sub>2</sub> ) | 1.7GHz (achieved by Co <sub>1</sub> Ni <sub>2</sub> ) | J Nanoengineering and Nanosystems 2014, 228(1), 52–56                           |
| CoNi chain                        | 1-3                      | -34.33 dB<br>(17.5GHz,1mm)    | 15.2-18GHz                                                | 2.8GHz                                                | <i>Journal of Magnetism and Magnetic Materials</i> , 2014, <b>372</b> , 195-200 |
| Co microflowers                   | 1-3                      | -11.0 dB<br>(13.2 GHz)        | 12.5-14.0 GHz                                             | 1.5GHz                                                | Phys. Status Solidi B, 2012, 249, 575–580.                                      |
| Co nanowires                      | 1-3                      | -2.5 dB<br>(6.5 GHz)          | -                                                         | -                                                     | Physica B, 2010, 405, 1484–1488.                                                |
| Co Sword-like                     | 1-3                      | -9.9 dB<br>(18.0 GHz)         | -                                                         | -                                                     | RSC Adv., 2014, 4, 40456–40463.                                                 |
| Co nanostructures                 | 2                        | -8.8 dB<br>(11GHz,2mm)        | -                                                         | -                                                     | J. Phys. Chem. C 2010, 114, 21214–21218                                         |
| Ni nanostructures                 | 2                        | -17.5 dB<br>(8.8GHz)          | 7-9.5GHz                                                  | 2.5GHz                                                | J. Phys. Chem. C 2010, 114, 21214–21218                                         |
| Ni nanowires                      | 1-2                      | -19 dB<br>(8GHz, 2mm)         | 7-11GHz                                                   | 4GHz                                                  | Journal of Applied Physics 105, 053911 (2009);                                  |
| CoNi alloys                       | 2-5                      | -28.5 dB<br>(17GHz)           | 16-18GHz                                                  | 2GHz                                                  | Here in this paper                                                              |
